# Supplementary material for: Fabrication of well-defined electromagnetic Fe3O4/polyaniline hollow microspheres and their application in Pb2+ uptake
Source: Royal Society of Chemistry journal article supplement (doi:10.1039/c4py00109e), 2014-01-01
Supplement: c4py00109e1.pdf [file c4py00109e1.pdf]

## Supporting Information

### Fabrication of well-defined electromagnetic Fe<sub>3</sub>O<sub>4</sub>/polyaniline hollow microspheres and their application on Pb<sup>2+</sup> uptake

Feng Wang,<sup>a</sup> Liyan Huang,<sup>\*a</sup> Jun Li,<sup>a</sup> Lina Lin,<sup>a</sup> Zhengping Liu<sup>a</sup> and Zhaoxia Dong<sup>b</sup>

<sup>a</sup> Beijing Key Laboratory of Energy Conversion and Storage Materials, College of Chemistry, Beijing Normal University, Beijing 100875, China

<sup>b</sup> Enhanced Oil Recovery Research Institute, China University of Petroleum, Beijing 102249, China

\* Corresponding authors. E-mail: hly@bnu.edu.cn

Table S1 Adsorption capacities for Pb<sup>2+</sup> by Fe<sub>3</sub>O<sub>4</sub>/PANI adsorbents prepared with different weight ratio of ANI/PS<sup>a</sup>

| Samples        | Weight ratio of ANI/PS | Thickness of PANI shell (nm) | Adsorption capacity (mg/g) |
|----------------|------------------------|------------------------------|----------------------------|
| 1 <sup>b</sup> | 1:4                    |                              | 273                        |
| 2              | 1:2.5                  | 30                           | 416                        |
| 3              | 1:1.7                  | 43                           | 535                        |

<sup>a</sup> The other conditions of preparing Fe<sub>3</sub>O<sub>4</sub>/PANI ( Sample1, 2 and 3) are the same, with the exception of different weight ratio of ANI/PS.

<sup>b</sup> When the weight ratio of ANI/PS is 1:4, the obtained Fe<sub>3</sub>O<sub>4</sub>/PANI (Sample 1) does not maintain the hollow structure.

Table S2 Adsorption capacities for Pb<sup>2+</sup> by Fe<sub>3</sub>O<sub>4</sub>/PANI adsorbents prepared with various amount of citric acid modified Fe<sub>3</sub>O<sub>4</sub> particles<sup>a</sup>

| Samples | Citric acid modified Fe <sub>3</sub> O <sub>4</sub> (g) | Adsorption capacity (mg/g) |
|---------|---------------------------------------------------------|----------------------------|
| 4       | 0.05                                                    | 661                        |
| 3       | 0.12                                                    | 535                        |
| 5       | 0.28                                                    | 481                        |

<sup>a</sup> The other conditions of preparing Fe<sub>3</sub>O<sub>4</sub>/PANI (Sample 3, 4 and 5) are the same, with the exception of various amount of citric acid modified Fe<sub>3</sub>O<sub>4</sub> particles.
